# Supplementary material
Source: Elsevier journal article supplement (https://www.sciencedirect.com/science/article/pii/S0021755722000705)
Supplement: mmc1 [file S0021755722000705:mmc1.docx]

**JPED-D-21-00409 – Supplementary Material**

**Supplementary Figure 1 - Flow chart of study participants in the control and intervention groups.**

30 included in the analysis

30 included in the analysis

31 assigned to the intervention group: Oral motor intervention plus non-nutritive sucking

30 assigned to the control group: Non-nutritive sucking

108 excluded

61 randomized

169 infants assessed for eligibility

1 discontinued intervention
